# Supplementary material for: Effect of haemodynamics on the risk of ischaemic stroke in patients with severe vertebral artery stenosis
Source: HighWire-hosted journal article supplement (doi:10.1136/svn-2021-001283), 2021-12-24
Supplement: svn-2021-001283supp001_data_supplement.pdf [file svn-2021-001283supp001_data_supplement.pdf]

Supplementary Table 1. Patients' demographic characteristics among different levels of NVAfV

|                                               | 0-112.8 (80) | 112.9-157.1(81) | 157.2-199(80) | 199.1-highst(80) | P value |
|-----------------------------------------------|--------------|-----------------|---------------|------------------|---------|
| Age                                           | 65±8         | 64±9            | 66±8          | 65±9             | 0.365   |
| Sex(male)                                     | 71 (88.8)    | 69 (85.2)       | 65 (81.2)     | 69 (86.2)        | 0.600   |
| Hypertension                                  | 64 (80.0)    | 63 (71.8)       | 59 (73.8)     | 63 (78.8)        | 0.799   |
| Coronary heart disease                        | 20 (25.0)    | 11 (13.6)       | 18 (22.5)     | 23 (28.7)        | 0.122   |
| Diabetes Mellitus                             | 22 (27.5)    | 35 (43.2)       | 30 (37.5)     | 30 (37.5)        | 0.218   |
| Smoking history                               | 51 (63.7)    | 54 (66.7)       | 50 (62.5)     | 54 (67.5)        | 0.898   |
| Dyslipidemia                                  | 39 (48.8)    | 34 (42)         | 46 (57.5)     | 30 (37.5)        | 0.062   |
| Glucose(mmol/L)                               | 5.7±1.8      | 5.8±1.8         | 5.9±2.2       | 6.0±2.2          | 0.820   |
| Cholesterol(mmol/L)                           | 3.5±1.0      | 3.7±0.9         | 3.5±0.8       | 3.6±0.9          | 0.510   |
| HDL(mmol/L)                                   | 1.1±0.3      | 1.0±0.2         | 1.1±0.3       | 1.1±0.3          | 0.511   |
| LDL(mmol/L)                                   | 2.0±0.8      | 2.2±0.8         | 2.0±0.7       | 2.0±0.7          | 0.461   |
| Antiplatelet                                  | 53(66.2)     | 45(55.6)        | 54(67.5)      | 46(57.5)         | 0.292   |
| Statin                                        | 48(60)       | 45(55.6)        | 54(67.5)      | 46(57.5)         | 0.432   |
| PCI                                           | 52 (65.0)    | 40(49.4)        | 29 (36.2)     | 21 (26.2)        | <0.001  |
| PCI+TIA                                       | 64 (80.0)    | 49(60.5)        | 50 (62.5)     | 33 (41.2)        | <0.001  |
| Mechanism                                     |              |                 |               |                  | <0.001  |
| No-PCI                                        | 28 (35.0)    | 41 (50.6)       | 51 (63.7)     | 59 (73.8)        |         |
| LAA                                           | 41 (51.2)    | 25 (30.9)       | 19 (23.8)     | 9 (11.2)         |         |
| Br A                                          | 11 (13.7)    | 15 (18.5)       | 10 (12.5)     | 12 (15.0)        |         |
| Combined with severe anterior artery stenosis | 26 (32.5)    | 30 (37.0)       | 32 (40.0)     | 46 (57.5)        | 0.008   |
| Contralateral VA stenosis                     |              |                 |               |                  | <0.001  |
| <70%                                          | 33 (41.2)    | 58 (71.6)       | 69 (86.3)     | 74 (92.5)        |         |
| ≥70% or occlusion                             | 36 (45.0)    | 15 (18.5)       | 10 (12.5)     | 6 (7.5)          |         |
| Hypoplasia (diameter less than 2.5 mm)        | 11 (13.8)    | 8 (9.9)         | 1 (1.2)       | 0                |         |

Severe anterior artery stenosis: Unilateral or bilateral extracranial carotid artery severe stenosis (≥70%) or occlusion

Supplementary Table2 . Two year recurrent ischemic stroke in each NVAFFV group

|                    | 8 <sup>th</sup> month | 16 <sup>th</sup> month | 24 <sup>th</sup> month |
|--------------------|-----------------------|------------------------|------------------------|
| Lower NVAFFV(145)  | 12(8.3)               | 21(14.5)               | 28(19.3)               |
| Higher NVAFFV(117) | 5(4.3)                | 6(5.1)                 | 6(5.1)                 |
